# Supplementary material for: Circadian neurons in the paraventricular nucleus entrain and sustain daily rhythms in glucocorticoids
Source: PubMed Central journal article supplement (PMC8486846; doi:10.1038/s41467-021-25959-9), 2021-10-01
Supplement: 41467_2021_25959_MOESM1_ESM.pdf [file 41467_2021_25959_MOESM1_ESM.pdf]

## **Supplementary Figures**

Circadian neurons in the paraventricular nucleus entrain and sustain daily rhythms in glucocorticoids

Jeff R. Jones, Sneha Chaturvedi, Daniel Granados-Fuentes, and Erik D. Herzog

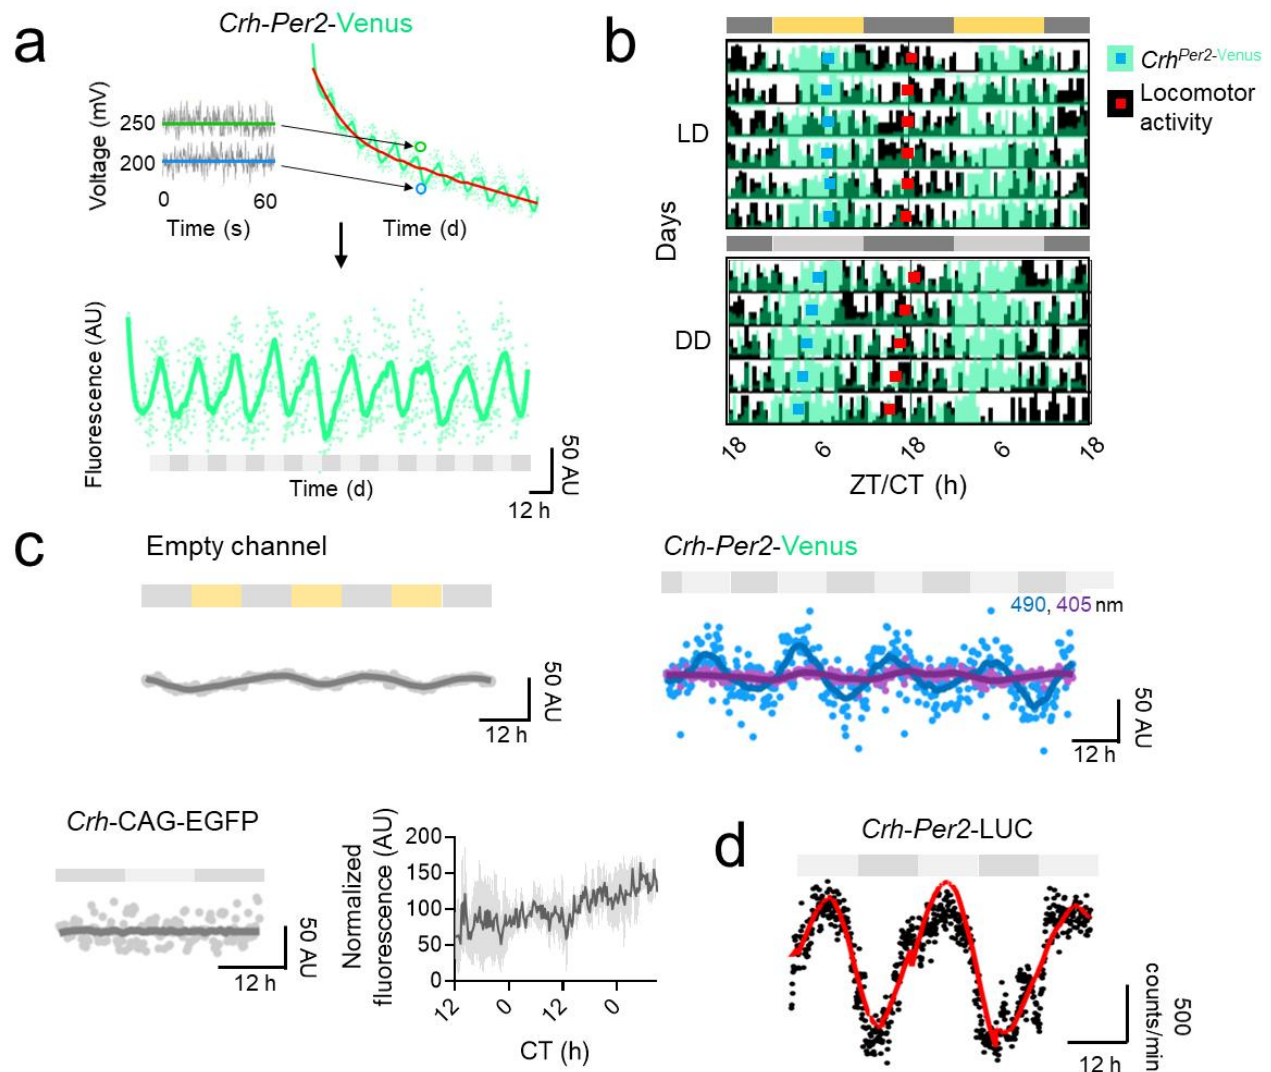

**Supplementary Figure 1, related to Figure 1. Controls illustrating the specificity of *Per2-Venus* recording in PVN<sup>CRH</sup> neurons.** **a)** Schematic for fiber photometry analysis of *Per2-Venus* fluorescence recorded over 10 days. For details, see methods. **b)** A representative LD and DD trace from an animal in which we recorded both *Per2-Venus* (light green) and locomotor activity (via infrared, black). Acrophases are depicted by blue (*Per2-Venus*) and red (locomotor activity) squares. **c)** Representative control traces recorded for 60 s every 15 min. *Top*, fluorescence values (gray dots) recorded from a fiber without a mouse over 3 d in LD. *Bottom*, fluorescence values recorded *in vivo* in DD for 36 h from the PVN of a representative (*left*), and 5 (*right*), *Crh-CAG-EGFP* mice (mean  $\pm$  SEM). *Right*, Five-day fluorescence traces recorded *in vivo* from the PVN of an individual *Crh-Per2-Venus* mouse excited with 490 nm and 405 nm light (blue and purple dots, respectively). The relative excitation of mVenus fluorescence at 490 nm is 0.37 and at 405 nm is 0.01 (fpbase.org). **d)** *In vivo* photon counts (black dots) recorded with a photomultiplier tube every 5 min in DD from an individual *Crh-Cre; Per2-DIO-luc* mouse that expressed *Per2*-driven luciferase in PVN<sup>CRH</sup> neurons. Data were smoothed with a 4 h Savitzky-Golay filter (red line). Light gray and dark gray bars represent subjective day and night, respectively.

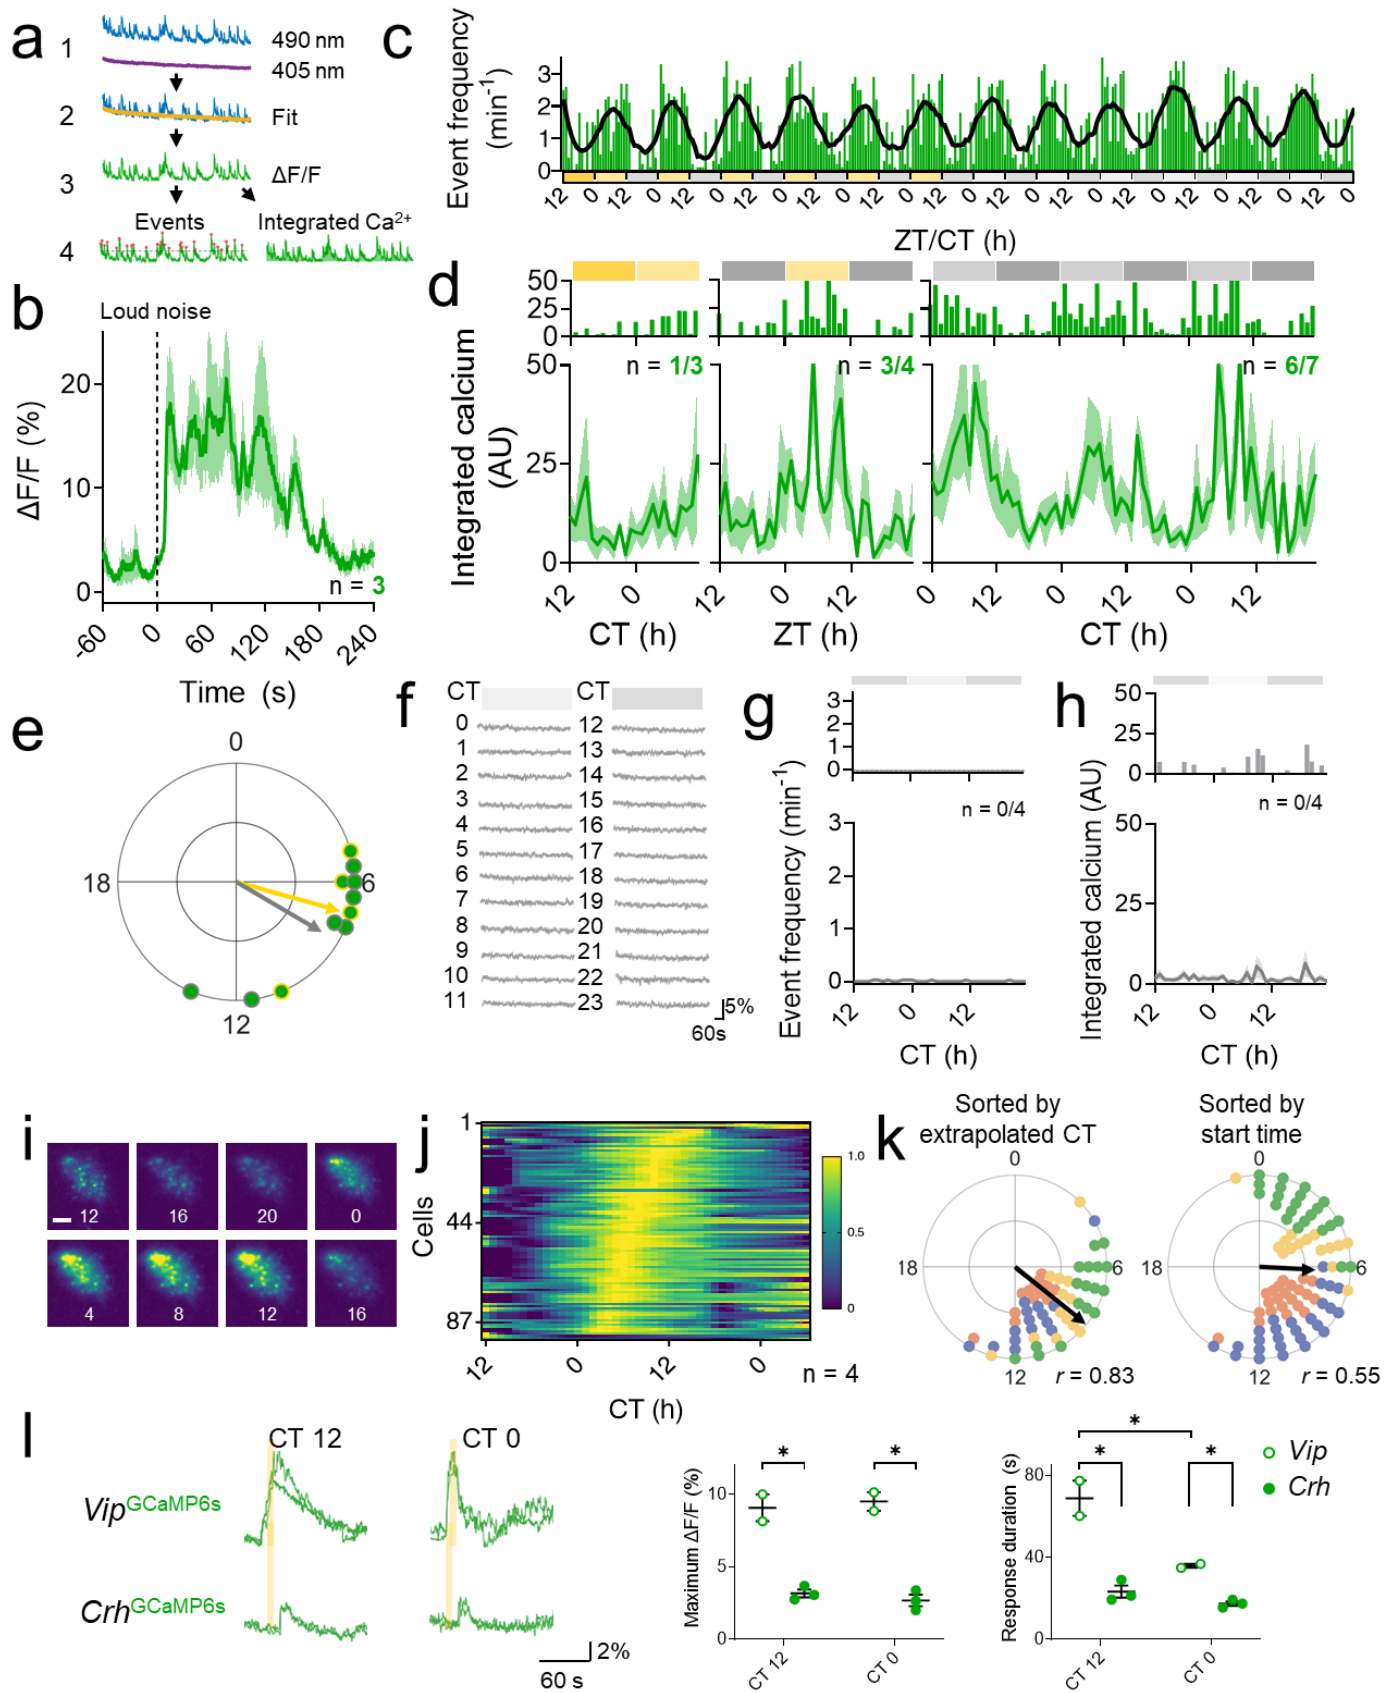

**Supplementary Figure 2, related to Figure 2. Circadian PVN<sup>CRH</sup> neurons rapidly respond to stress, but not light.** **a**) Schematic for fiber photometry analysis of GCaMP6s fluorescence. For details, see methods. **b**) *In vivo* GCaMP6s fluorescence in PVN<sup>CRH</sup> neurons before and after presenting mice (n = 3, 2 replicates per animal) with a stressor (a loud noise). Green lines and shading depict mean  $\pm$  SEM. **c**) *In vivo* PVN<sup>CRH</sup> neuron calcium event frequency (green bars) from a representative mouse housed in LL, LD, and DD over 12 days.

Data were smoothed with a 4 h Savitzky-Golay filter (black line). **d)** Integrated calcium level rhythms from PVN<sup>CRH</sup> neurons in mice recorded in LL (n = 1/3 mice circadian, JTK cycle,  $p = 0.035$  for 1 mouse, see Supplementary Table 1 for  $p$  values of individual mice), LD (n = 3/4 mice rhythmic, JTK cycle,  $p < 0.001$  for 3 mice, see Supplementary Table 1 for  $p$  values of individual mice) and in DD (n = 6/7 mice rhythmic, JTK cycle,  $p < 0.042$  for 6 mice, see Supplementary Table 1 for  $p$  values of individual mice). *Top*, integrated calcium level rhythms from a representative mouse; *bottom*, integrated calcium level rhythms averaged from multiple mice. Green lines and shading depict mean  $\pm$  SEM. **e)** Rayleigh plots of integrated calcium level rhythms in PVN<sup>CRH</sup> neurons from mice housed in LD (green dots with yellow outlines; peak time ZT 7.0, Rayleigh test,  $p = 0.041$ ) and in DD (gray outlines; peak time CT 8.0, Rayleigh test,  $p = 0.012$ ). **f)** Representative control (EGFP) traces (in  $\Delta F/F$ ) from PVN<sup>CRH</sup> neurons recorded hourly from a mouse in DD (where light gray = subjective day). **g)** Event frequencies from PVN<sup>CRH</sup> neurons in control (EGFP) mice recorded in DD (n = 0/4 mice rhythmic, JTK Cycle,  $p = 1$  for all mice). *Top*, event frequencies from a representative control mouse; *bottom*, event frequencies averaged from multiple control mice. Gray lines and shading depict mean  $\pm$  SEM. **h)** Integrated fluorescence levels from PVN<sup>CRH</sup> neurons in control (EGFP) mice recorded in DD (n = 0/4 mice rhythmic, JTK Cycle,  $p = 1$  for all mice). *Top*, integrated fluorescence levels from a representative control mouse; *bottom*, integrated fluorescence levels averaged from multiple control mice. Gray lines and shading depict mean  $\pm$  SEM. **i)** Representative PVN<sup>CRH</sup> GCaMP6s fluorescence recorded from an *ex vivo* PVN slice over 36 h. Warmer colors depict greater fluorescence. Numbers depict the extrapolated circadian time (in h) of the recording. Scale bar=100  $\mu$ m. **j)** Raster plot of PVN<sup>CRH</sup> calcium levels recorded hourly from individual neurons (n = 94 neurons, 4 slices). Color bar depicts fluorescence intensity in arbitrary units. **k)** Rayleigh plots of calcium fluorescence rhythms in PVN<sup>CRH</sup> neurons from *ex vivo* PVN slices. Each dot color represents a different PVN slice. *Left*, data sorted by extrapolated CT (peak time CT 8.5, JTK Cycle,  $p < 0.001$ ). *Right*, the same data sorted by the start time of the recording (peak time CT 6.0, JTK Cycle,  $p < 0.001$ ). Sorting methods resulted in significantly different mean peak times (Two-way circular ANOVA,  $p < 0.001$ ). Individual slices had similar times of peak calcium when plotted as extrapolated CT, but differed in their peak times when data were sorted by the start time of the recording. **l)** *Left*, representative calcium fluorescence traces (in  $\Delta F/F$ ) from (*top*) SCN<sup>VIP</sup> neurons of *Vip*-Cre + GCaMP6s (*Vip*, n = 2) mice and (*bottom*) PVN<sup>CRH</sup> neurons of *Crh*-Cre + GCaMP6s (*Crh*, n = 3) mice in response to a 10 s light pulse at CTs 12 or 0. Two-way repeated measures ANOVA with post-hoc Sidak's multiple comparisons test,  $*p < 0.001$ . *Right*, maximum calcium fluorescence and duration of responses (time until half-maximum) after a 10 s light pulse at CT 12 or 0 in *Vip* (open green circles) and *Crh* (filled green circles) mice. Two-way repeated measures ANOVA with post-hoc Sidak's multiple comparisons test,  $*p = 0.020$ ,  $**p < 0.001$ . Source data are provided as a Source Data file.

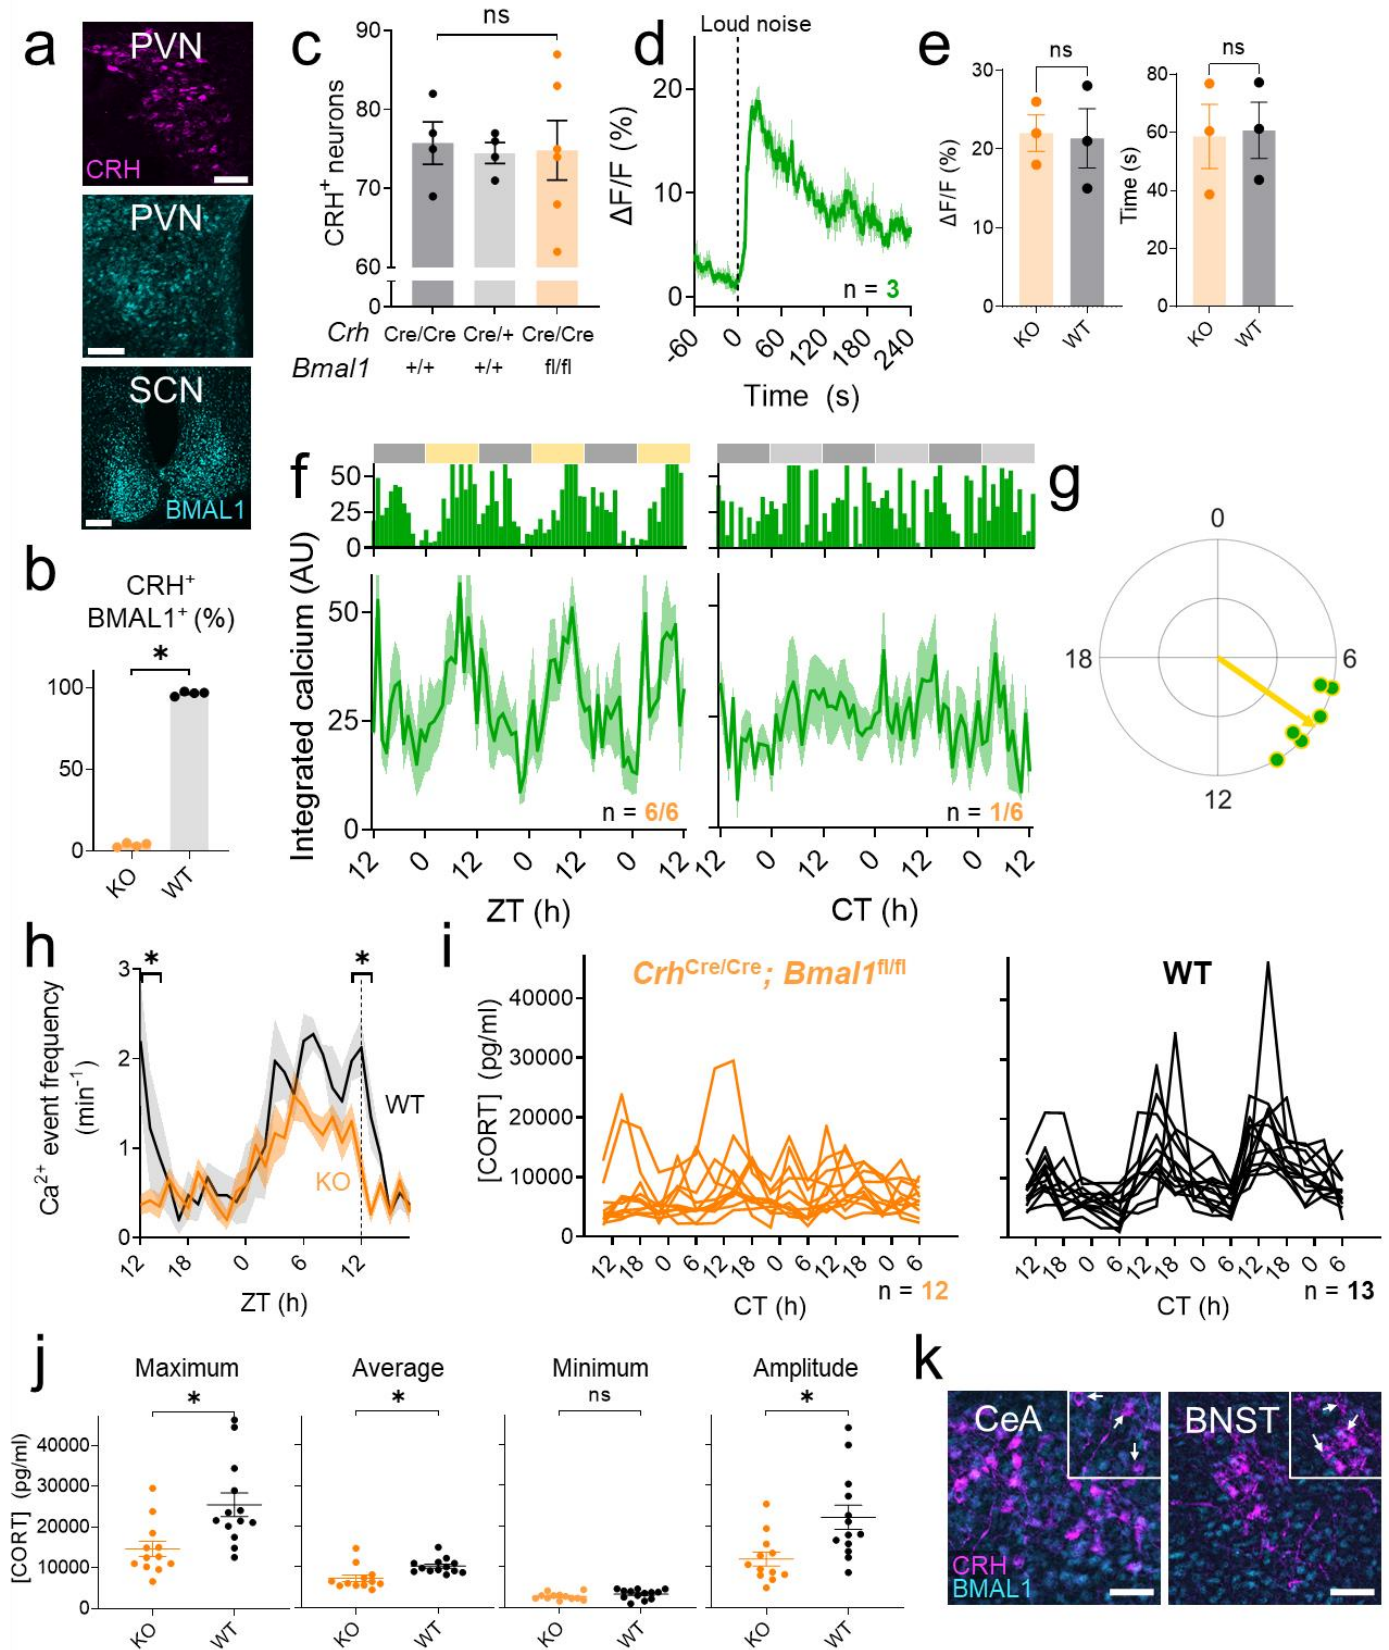

**Supplementary Figure 3, related to Figure 3. Loss of BMAL1 in CRH neurons results in the loss of circadian, but not stress-induced, regulation of activity and of corticosterone release.** **a)** Representative immunohistochemistry images from a *Crh*<sup>Cre/Cre</sup>; *Bmal1*<sup>fl/fl</sup> mouse depicting CRH (magenta) and BMAL1 (cyan) expression in the PVN and SCN. Scale bar 100  $\mu$ m. **b)** Percentage of CRH<sup>+</sup> neurons in the PVN that co-

expressed BMAL1 in *Crh*<sup>Cre/+</sup>; *Bmal1*<sup>fl/fl</sup> (WT, n = 4) and *Crh*<sup>Cre/Cre</sup>; *Bmal1*<sup>fl/fl</sup> (KO, n = 4) mice. Unpaired two-tailed Welch's *t*-test,  $p < 0.001$ . **c**) CRH neuron numbers in the PVN of *Crh*<sup>Cre/Cre</sup> (n = 4), *Crh*<sup>Cre/+</sup> (n = 4), and *Crh*<sup>Cre/Cre</sup>; *Bmal1*<sup>fl/fl</sup> mice (n = 6). Brown-Forsythe ANOVA,  $p = 0.955$ . In **(b-c)**, mice were injected with colchicine, perfused 24 h later at CT 6, and sectioned. Brains were processed and stained identically (same antibody concentrations, durations, etc.). Images were taken using identical laser and capture settings. Lines depict mean  $\pm$  SEM. **d**) *In vivo* GCaMP6s fluorescence in PVN<sup>CRH</sup> neurons before and after presenting KO mice (n = 3, 2 replicates per animal) with a stressor (a loud noise). Green lines and shading depict mean  $\pm$  SEM. **e**) (*Left*) Maximum calcium fluorescence and (*right*) duration of responses (time until half-maximum) in PVN<sup>CRH</sup> neurons recorded from WT (n = 3) and KO (n = 3) mice after a stressor. Unpaired two-tailed Welch's *t*-test,  $p = 0.889$ ,  $0.895$  for maximum fluorescence and response duration, respectively. Lines depict mean  $\pm$  SEM. **f**) Integrated calcium level rhythms from PVN<sup>CRH</sup> neurons in KO mice recorded in LD (n = 6/6 mice rhythmic, JTK Cycle,  $p < 0.018$  for all mice, see Supplementary Table 1 for  $p$  values of individual mice) and in DD (n = 1/6 mice rhythmic, JTK Cycle  $p < 0.001$  for 1 mouse, see Supplementary Table 1 for  $p$  values of individual mice). *Top*, integrated calcium level rhythms from a representative mouse; *bottom*, integrated calcium level rhythms averaged from multiple mice. Green lines and shading depict mean  $\pm$  SEM. **g**) Rayleigh plots of integrated calcium level rhythms in PVN<sup>CRH</sup> neurons from KO mice housed in LD (green dots with yellow outlines; peak time ZT 8.3, Rayleigh test,  $p = 0.001$ ; KO vs WT peak time, Watson-Williams test  $p = 0.289$ ). Arrhythmic recordings from KO mice housed in DD are not depicted. **h**) Calcium event frequency rhythms over the first 30 h of recording of WT (black, n = 4) and KO (orange, n = 6) mice housed in LD. Vertical dashed line at ZT 12 represents lights-off. Two-way repeated measures ANOVA with post-hoc Sidak's multiple comparisons test,  $*p = 0.005$ ,  $**p = 0.001$ . Lines and shading depict mean  $\pm$  SEM. **i**) Individual fecal corticosterone rhythms measured every 4 h over three days in WT (black, n = 13) and KO mice (orange, n = 12). **j**) Maximum, average, peak-trough amplitude, and minimum levels of fecal corticosterone averaged over three days in WT (black, n = 13) and KO (orange, n = 12) mice. Unpaired two-tailed Welch's *t*-test or two-tailed Mann-Whitney *U* test,  $p = 0.005$ ,  $0.002$ ,  $0.169$ , and  $0.007$  for maximum, average, minimum, and amplitude, respectively. Lines depict mean  $\pm$  SEM. **k**) Representative immunohistochemistry images from *Crh*<sup>Cre/Cre</sup>; *Bmal1*<sup>fl/fl</sup> mouse (n = 4) depicting CRH (magenta) and BMAL1 (cyan) expression in the central nucleus of the amygdala (CeA) and bed nucleus of the stria terminalis (BNST). Scale bar 100  $\mu$ m. Inset, higher magnification image. Source data are provided as a Source Data file.

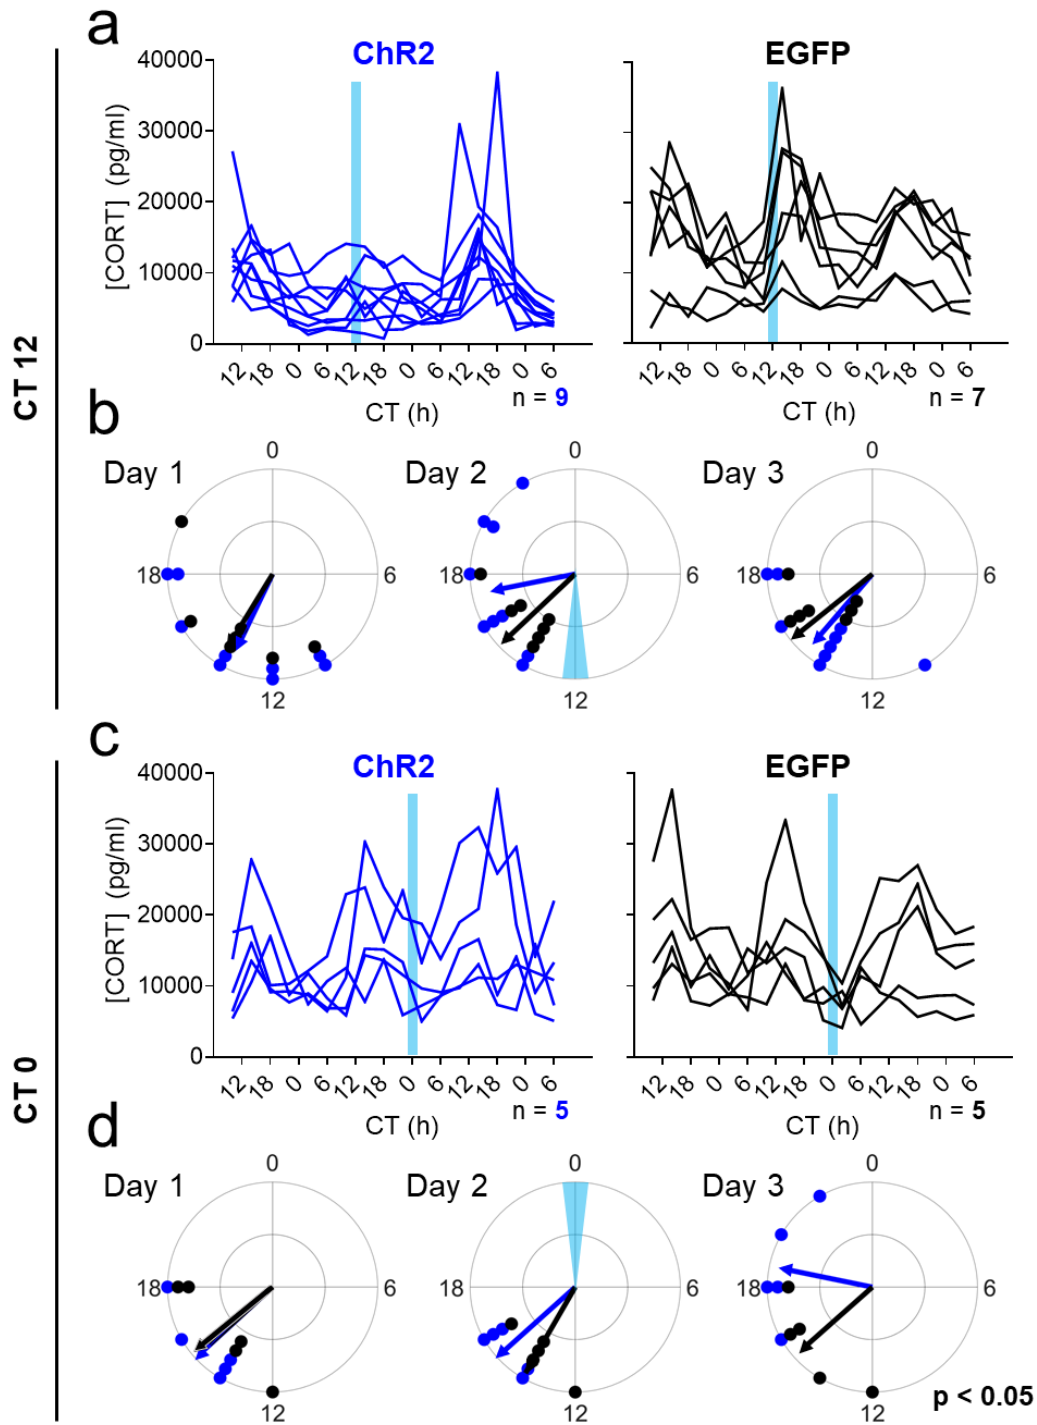

**Supplementary Figure 4, related to Figure 4. Corticosterone rhythms are greatly attenuated by SCN<sup>VIP</sup> neuron activation around subjective dusk. a)** Individual fecal corticosterone rhythms measured every 4 h over three days in *Vip<sup>Cre/+</sup>* + ChR2 (ChR2, blue, n = 9) and *Vip<sup>Cre/+</sup>* + EGFP (EGFP, black, n = 7) mice optogenetically stimulated (blue line) on Day 2 from CT 11-13. **b)** Rayleigh plots of corticosterone rhythms in EGFP (black dots, peak times Day 1-3 CTs 14.9, 15.1, 15.4, Rayleigh test,  $p = 0.014, 0.001, 0.001$  on days 1, 2, and 3, respectively) and ChR2 (blue, peak times Days 1-3 CTs 13.7, 17.2, 14.7, Rayleigh test,  $p = 0.005, 0.002, 0.001$  on days 1, 2, and 3, respectively) mice on each day of collection. Blue shading on Day 2 represents the time of optogenetic stimulation. **c)** Individual fecal corticosterone rhythms measured every 4 h over three days in ChR2 (blue, n = 5) and EGFP (black, n = 5) mice optogenetically stimulated (blue line) on

Day 2 from CT 23-1. **d)** Rayleigh plots of corticosterone rhythms in EGFP (black dots, peak times Days 1-3 CT 15.1, 14.1, 15.2, Rayleigh test,  $p = 0.028, 0.005, 0.015$  on days 1, 2, and 3, respectively) and ChR2 (blue, peak times Days 1-3 CTs 15.1, 15.2, 18.7, Rayleigh test,  $p = 0.008, 0.003, 0.015$  on days 1, 2, and 3, respectively) mice on each day of collection. Blue shading on Day 2 represents the time of optogenetic stimulation. Phases differed significantly between genotypes on Day 3 (Two-way circular ANOVA and Watson-Williams tests,  $p = 0.042$ ). Source data are provided as a Source Data file.



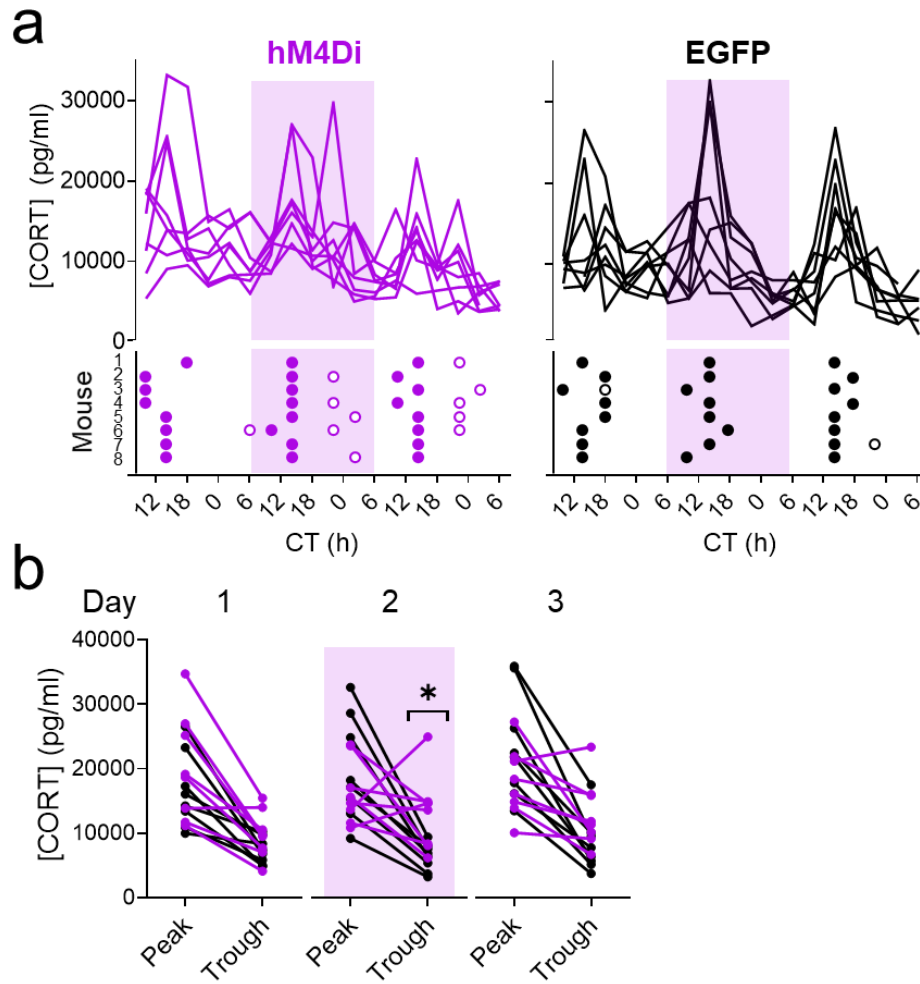

**Supplementary Figure 5, related to Figure 5. Silencing SCN<sup>VIP</sup> neurons produces a second peak of corticosterone release during the early morning.** **a)** *Top*, individual fecal corticosterone rhythms measured every 4 h over three days in *Vip<sup>Cre/+</sup>* + hM4Di (purple, n = 8) and *Vip<sup>Cre/+</sup>* + EGFP (black, n = 8) mice given *ad libitum* clozapine-N-oxide (1 mg/kg) in their drinking water (purple shading) from CT 6 on Day 2 until CT 6 on Day 3. *Bottom*, peak times of corticosterone release as determined by a peak-finding algorithm in hM4Di and EGFP mice. Filled circles represent the first peak on each day, open circles represent subsequent peaks. **b)** The average peak (CT 10-18) and trough (CT 22-6) corticosterone amplitudes in EGFP (black) and hM4Di (purple) mice on each day of collection. Purple shading, time of *ad libitum* exposure to CNO in the drinking water for 24 h. Two-way repeated measures ANOVA with post-hoc Sidak's multiple comparisons test,  $p = 0.044$ . Source data are provided as a Source Data file.

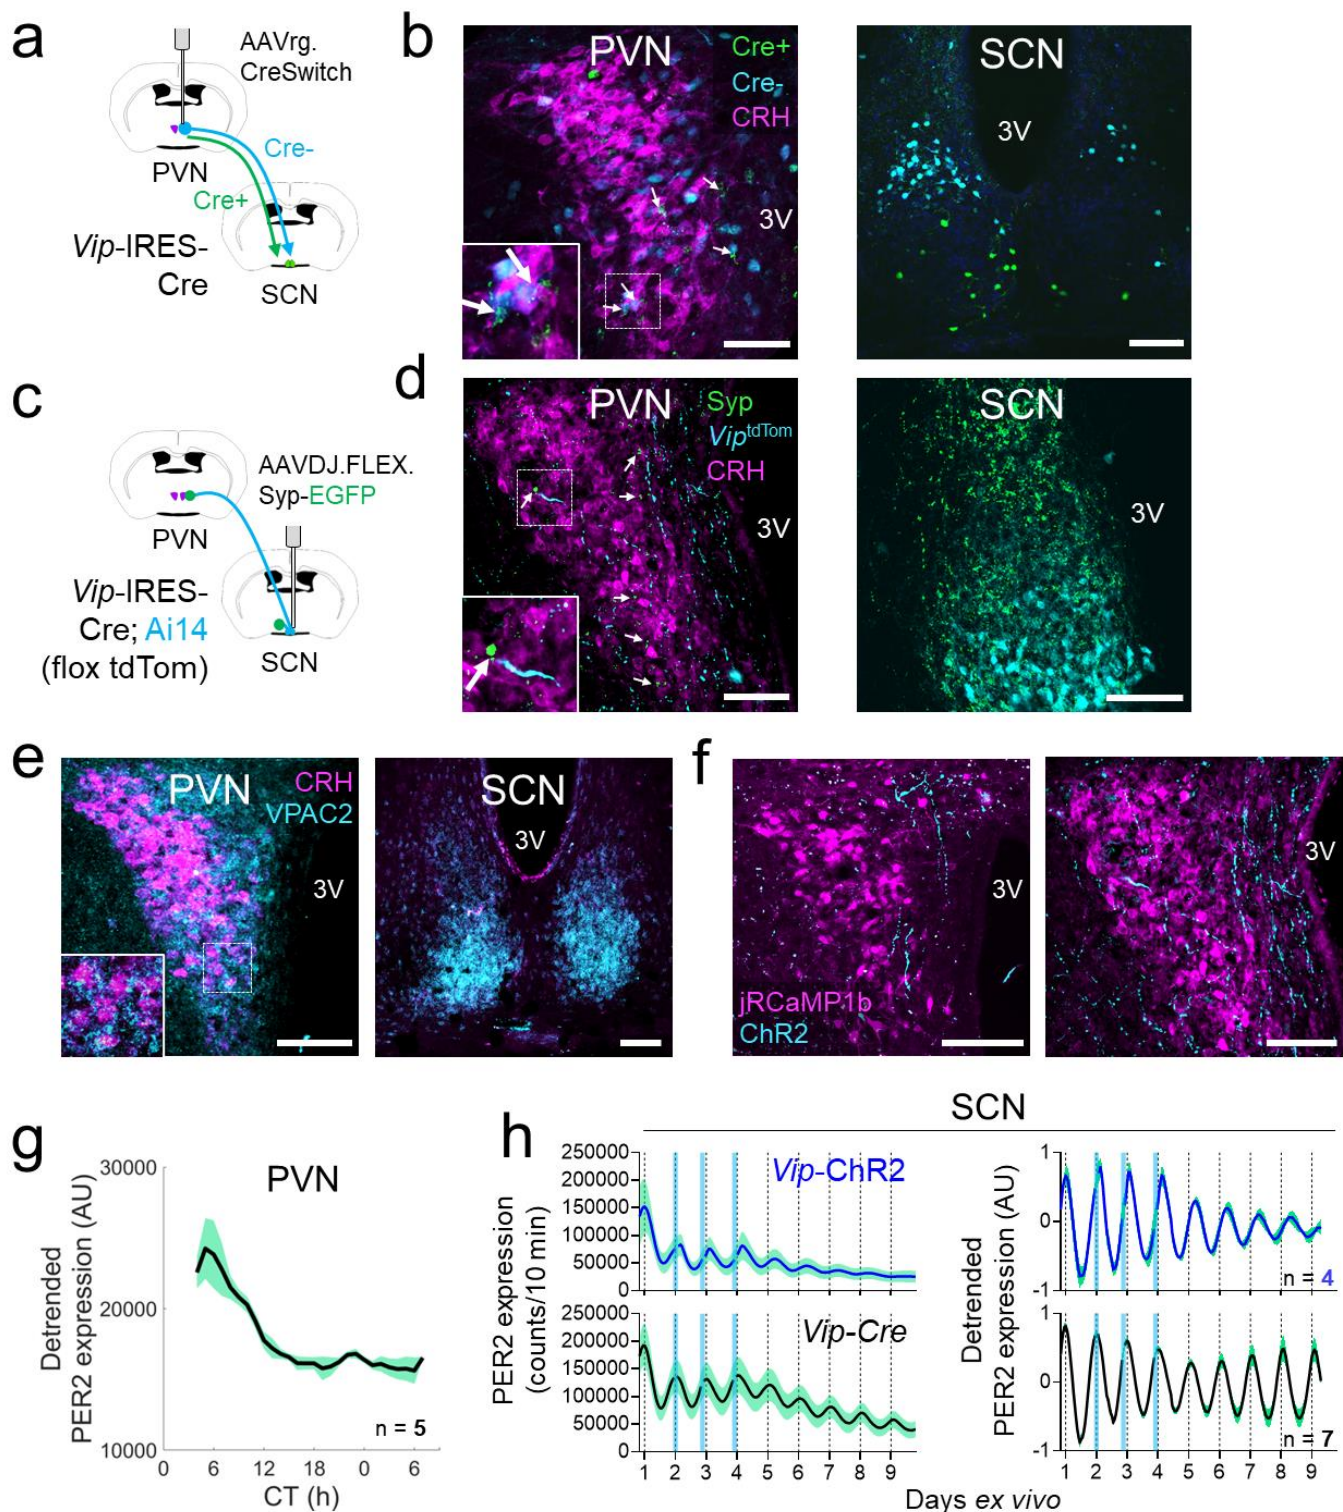

**Supplementary Figure 6, related to Figure 6. Sparse monosynaptic connections and high levels of VPAC2 receptor expression suggest SCN<sup>VIP</sup> neurons communicate volumetrically with PVN<sup>CRH</sup> neurons.** **a**) Schematic for retrograde monosynaptic tracing. The PVN of *Vip*<sup>Cre/+</sup> mice ( $n = 4$ ) was unilaterally injected with a retrograde "CreSwitch" AAV that encodes tdTomato in the absence of Cre and EGFP in the presence of Cre. After transfection, starter neurons in the PVN and Cre<sup>-</sup> projection neurons in the SCN would express tdTom, and *Vip*-Cre<sup>+</sup> projection neurons in the SCN would express EGFP. **b**) Representative ( $n = 4$  replicates) images of the same CreSwitch-injected mouse. (Left), PVN showing CRH immunoreactivity (magenta), virally-labeled Cre<sup>-</sup> starter neurons (cyan), and *Vip*-Cre<sup>+</sup> axons (green). Inset, higher magnification image. (Right), SCN showing retrograde virally-labeled Cre<sup>-</sup> projection neurons (cyan) and *Vip*-Cre<sup>+</sup> projection neurons (green). 3V, third ventricle. Scale bar=100  $\mu$ m. **c**) Schematic for anterograde tracing. The SCN of

*Vip*<sup>Cre/+</sup>; Ai14 (floxed tdTomato) mice (n = 4) was unilaterally injected with an anterograde AAV that expresses EGFP-fused synaptophysin in Cre<sup>+</sup> neurons. After transfection, *Vip*-Cre<sup>+</sup> axons expressing tdTomato and synaptic terminals expressing EGFP would label monosynaptic connections between the SCN and PVN. **d**) Representative (n = 4 replicates) images of the same synaptophysin-EGFP-injected mouse. (*Left*), PVN showing CRH immunoreactivity (magenta), tdTomato-expressing *Vip*-Cre<sup>+</sup> axons (cyan), and virally-labeled EGFP-fused synaptophysin in *Vip*-Cre<sup>+</sup> axons (green). Inset, higher magnification image. (*Right*), SCN showing tdTomato-expressing *Vip*-Cre<sup>+</sup> neurons (cyan) and virally-labeled EGFP-fused synaptophysin in *Vip*-Cre<sup>+</sup> axons (green). 3V, third ventricle. Scale bar=100  $\mu$ m. **e**) Representative (n = 4 replicates) immunocytochemistry images from the same wild-type mouse depicting CRH (magenta) and the VIP receptor VPAC2 (cyan) in (*left*) the PVN and (*right*) the SCN. Inset, higher magnification image. 3V, third ventricle. Scale bar=100  $\mu$ m. **f**) Representative (n = 4 replicates total) images from two additional *Vip*<sup>Flp/+</sup>; *Crh*<sup>Cre/+</sup> mice showing concurrent Flp-dependent ChR2 (cyan) and Cre-dependent jRCaMP1b (magenta) expression in the PVN. 3V, third ventricle. Scale bar=100  $\mu$ m. **g**) Detrended PER2::LUC bioluminescence from isolated *ex vivo* PVN slices (n = 5) over 25 h. Line and shading depict mean  $\pm$  SEM. **h**) (*Left*) Raw and (*right*) detrended PER2::LUC bioluminescence traces from the SCN of *Vip*<sup>Cre/+</sup>; PER2<sup>LUC/+</sup> (black, n = 6) and *Vip*<sup>Cre/+</sup>; Ai32<sup>fl/+</sup>; PER2<sup>LUC/+</sup> (blue, n = 4) mice stimulated for 1 h per day for 3 d (blue bars, 8 Hz, 470 nm, 10 ms). Source data are provided as a Source Data file.

| Figure                  | Subject                                  | n                      | Test                                                                                      | Result                                                                                                                          | Post-hoc test (if applicable)       | Result                      |
|-------------------------|------------------------------------------|------------------------|-------------------------------------------------------------------------------------------|---------------------------------------------------------------------------------------------------------------------------------|-------------------------------------|-----------------------------|
| 1e                      | LL P2V                                   | 3 mice                 | JTK Cycle                                                                                 | 3/3 rhythmic; $p = 0.011, 0.001, < 0.001$ ; 95% CI [CT 4.7, 13.4]                                                               |                                     |                             |
|                         | LD P2V                                   | 7 mice                 |                                                                                           | 7/7 rhythmic; $p < 0.001$ for all mice; 95% CI [ZT 4.6, 7.2]                                                                    |                                     |                             |
|                         | DD P2V                                   | 7 mice                 |                                                                                           | 7/7 rhythmic; $p < 0.001$ for all mice; 95% CI [CT 4.1, 6.5]                                                                    |                                     |                             |
| 1f                      | P2V amplitude                            | 3, 7, 7 mice           | Brown-Forsythe ANOVA                                                                      | $F(2.00, 10.74) = 8.2, p = 0.007$                                                                                               | Dunnett's Multiple Comparisons Test | $p = 0.021$                 |
| 1g                      | LD P2V                                   | 7 mice                 | Rayleigh Test                                                                             | $p = 0.001, z = 5.66, \mu = ZT 5.9, r = 0.90$                                                                                   |                                     |                             |
|                         | DD P2V                                   | 7 mice                 |                                                                                           | $p = 0.001, z = 5.82, \mu = CT 5.3, r = 0.91$                                                                                   |                                     |                             |
| 2d                      | LL Ca2+ events                           | 3 mice                 | JTK Cycle                                                                                 | 0/3 rhythmic; $p = 0.146, 0.191, 0.325$                                                                                         |                                     |                             |
|                         | LD Ca2+ events                           | 4 mice                 |                                                                                           | 4/4 rhythmic; $p < 0.001$ for all mice; 95% CI [ZT 5.7, 8.5]                                                                    |                                     |                             |
|                         | DD Ca2+ events                           | 7 mice                 |                                                                                           | 7/7 rhythmic; $p = 0.030, 0.004, \text{ and } < 0.001$ for 5 mice; 95% CI [CT 6.3, 9.7]                                         |                                     |                             |
| 2e                      | LD Ca2+ events                           | 4 mice                 | Rayleigh Test                                                                             | $p = 0.019, z = 3.47, \mu = ZT 7.1, r = 0.93$                                                                                   |                                     |                             |
|                         | DD Ca2+ events                           | 7 mice                 |                                                                                           | $p = 0.003, z = 4.94, \mu = CT 7.7, r = 0.84$                                                                                   |                                     |                             |
| 3d                      | KO LD Ca2+ events                        | 6 mice                 | JTK Cycle                                                                                 | 6/6 rhythmic; $p = 0.034, 0.004, \text{ and } < 0.001$ for 4 mice; 95% CI [ZT 6.3, 8.3]                                         |                                     |                             |
|                         | KO DD Ca2+ events                        | 6 mice                 |                                                                                           | 0/6 rhythmic; $p = 0.082, 0.070, \text{ and } 1$ for 4 mice                                                                     |                                     |                             |
| 3e                      | KO LD Ca2+ events                        | 6 mice                 | Rayleigh Test                                                                             | $p = 0.001, z = 5.39, \mu = ZT 7.3, r = 0.95$                                                                                   |                                     |                             |
|                         | KO vs WT LD Ca2+ events                  | 6, 4 mice              | Watson-Williams Test                                                                      | $F(1, 8) = 0.07, p = 0.796$                                                                                                     |                                     |                             |
| 3f                      | KO vs WT corticosterone rhythm           | 12, 13 mice            | Mixed-effects model (REML)                                                                | Time $F(17, 365) = 9.17, p < 0.001$<br>Genotype $F(1, 23) = 11.03, p = 0.003$<br>Time x Genotype $F(17, 365) = 3.79, p < 0.001$ | Sidak's Multiple Comparisons Test   | $p = 0.041, 0.009, < 0.001$ |
| 3g                      | KO vs WT peak-trough amplitude           | 12, 13 mice            | Two-Way Repeated Measures ANOVA                                                           | Genotype $F(1, 23) = 32.9, p < 0.001$                                                                                           | Sidak's Multiple Comparisons Test   | $p = 0.002, < 0.001$        |
| 3h                      | KO corticosterone phase                  | 12 mice                | Rayleigh Test                                                                             | Day 1<br>$p = 0.427, z = 0.87, \mu = CT 20.2, r = 0.27$                                                                         |                                     |                             |
|                         | Day 2                                    |                        |                                                                                           | $p = 0.101, z = 2.28, \mu = CT 17.9, r = 0.43$                                                                                  |                                     |                             |
|                         | Day 3                                    |                        |                                                                                           | $p = 0.720, z = 0.34, \mu = CT 14.5, r = 0.17$                                                                                  |                                     |                             |
|                         | WT corticosterone phase                  | 13 mice                | Rayleigh Test                                                                             | Day 1<br>$p < 0.001, z = 8.36, \mu = CT 15.3, r = 0.80$                                                                         |                                     |                             |
|                         | Day 2                                    |                        |                                                                                           | $p < 0.001, z = 8.76, \mu = CT 14.4, r = 0.82$                                                                                  |                                     |                             |
|                         | Day 3                                    |                        |                                                                                           | $p < 0.001, z = 11.95, \mu = CT 14.2, r = 0.96$                                                                                 |                                     |                             |
| KO vs WT                | 12, 13 mice                              | Watson-Williams Test   | Day 1<br>Genotype $X^2 = x, p < 0.001$                                                    |                                                                                                                                 |                                     |                             |
| Day 2                   |                                          |                        | $F(1, 23) = 4.70, p = 0.040$                                                              |                                                                                                                                 |                                     |                             |
| Day 3                   |                                          |                        | $F(1, 23) = 4.36, p = 0.048$<br>$F(1, 23) = 0.42, p = 0.838$                              |                                                                                                                                 |                                     |                             |
| 4c                      | ChR2 vs EGFP corticosterone rhythm CT 12 | 9, 7 mice              | Mixed-effects model (REML)                                                                | Time $F(17, 208) = 6.89, p < 0.001$<br>Genotype $F(1, 14) = 7.05, p = 0.017$<br>Time x Genotype $F(17, 208) = 2.37, p = 0.008$  | Sidak's Multiple Comparisons Test   | $p < 0.001$                 |
| 4d                      | ChR2 vs EGFP peak-trough amplitude CT 12 | 9, 7 mice              | Two-Way Repeated Measures ANOVA                                                           | Time $F(2, 28) = 7.8, p = 0.002$<br>Time x Genotype $F(2, 28) = 7.2, p = 0.003$                                                 | Sidak's Multiple Comparisons Test   | $p = 0.043$                 |
| 4e                      | ChR2 vs EGFP corticosterone rhythm CT 0  | 5, 5 mice              | Mixed-effects model (REML)                                                                | Time $F(17, 129) = 2.21, p = 0.002$                                                                                             |                                     |                             |
| 4f                      | ChR2 vs EGFP peak-trough amplitude CT 0  | 5, 5 mice              | Two-Way Repeated Measures ANOVA                                                           | Time x Genotype $F(2, 16) = 3.53, p = 0.054$                                                                                    |                                     |                             |
| 5c                      | hM4Di vs EGFP corticosterone rhythm      | 8, 8 mice              | Mixed-effects model (REML)                                                                | Time $F(17, 224) = 10.10, p < 0.001$<br>Genotype $F(1, 14) = 3.95, p = 0.066$                                                   |                                     |                             |
| 5d                      | EGFP peak 1 phase                        | 8 mice                 | Rayleigh Test                                                                             | Day 1<br>$p = 0.004, z = 4.88, \mu = CT 15.0, r = 0.78$                                                                         |                                     |                             |
|                         | Day 2                                    |                        |                                                                                           | $p = 0.002, z = 5.38, \mu = CT 13.5, r = 0.82$                                                                                  |                                     |                             |
|                         | Day 3                                    |                        |                                                                                           | $p < 0.001, z = 6.50, \mu = CT 14.9, r = 0.90$                                                                                  |                                     |                             |
|                         | hM4Di peak 1 phase                       | 8 mice                 | Rayleigh Test                                                                             | Day 1<br>$p = 0.004, z = 4.88, \mu = CT 12.9, r = 0.78$                                                                         |                                     |                             |
|                         | Day 2                                    |                        |                                                                                           | $p < 0.001, z = 7.13, \mu = CT 13.5, r = 0.94$                                                                                  |                                     |                             |
|                         | Day 3                                    |                        |                                                                                           | $p < 0.001, z = 6.50, \mu = CT 13.1, r = 0.90$                                                                                  |                                     |                             |
|                         | hM4Di peak 2 phase                       | 8 mice                 | Rayleigh Test                                                                             | Day 2<br>$p = 0.013, z = 3.80, \mu = CT 23.6, r = 0.87$                                                                         |                                     |                             |
|                         | Day 3                                    |                        |                                                                                           | $p = 0.007, z = 4.20, \mu = CT 22.7, r = 0.92$                                                                                  |                                     |                             |
| EGFP vs hM4Di           | 8, 8 mice                                | Two-Way Circular ANOVA | Day 1<br>Genotype $F(1, 42) = 3.61, p > 0.05$                                             |                                                                                                                                 |                                     |                             |
| Day 2                   |                                          |                        | Time $F(2, 42) = 0.52, p > 0.05$                                                          |                                                                                                                                 |                                     |                             |
| Day 3                   |                                          |                        | $F(1, 14) = 2.23, p > 0.05$<br>$F(1, 14) = 0.04, p > 0.05$<br>$F(1, 14) = 4.01, p > 0.05$ |                                                                                                                                 |                                     |                             |
| Day 2 hM4Di peak 1 vs 2 | 8, 8 mice                                | Watson-Williams Test   | Day 2<br>$F(1, 11) = 80.68, p < 0.001$                                                    |                                                                                                                                 |                                     |                             |
| Day 3 hM4Di peak 1 vs 2 |                                          |                        | Day 3<br>$F(1, 11) = 72.27, p < 0.001$                                                    |                                                                                                                                 |                                     |                             |
| 5e                      | hM4Di vs EGFP peak-trough amplitude      | 8, 8 mice              | Two-Way Repeated Measures ANOVA                                                           | Genotype $F(1, 14) = 15.98, p = 0.001$                                                                                          | Sidak's Multiple Comparisons Test   | $p = 0.010, 0.006$          |
| 6e                      | Pre vs post stim Ca2+ events             | 4 slices (102 cells)   | Nested One-Way ANOVA between slices                                                       | $F(1, 6) = 2.90, p = 0.140$                                                                                                     |                                     |                             |
|                         | Pre vs post stim integrated Ca2+         | 4 slices (102 cells)   | Two-Way Repeated Measures ANOVA                                                           | Time $F(1, 101) = 66.52, p < 0.001$                                                                                             |                                     |                             |
| 6h                      | Before vs during CNO Ca2+ events         | 3 slices (151 cells)   | Nested One-Way ANOVA between slices                                                       | $F(1, 4) = 0.21, p = 0.673$                                                                                                     |                                     |                             |
|                         | Before vs during CNO integrated Ca2+     | 3 slices (151 cells)   | Two-Way Repeated Measures ANOVA                                                           | Time $F(1, 160) = 0.89, p = 0.345$                                                                                              |                                     |                             |
| 6j                      | SCN vs PVN, ChR2 vs EGFP P2L rhythms     | 6, 4 slices            | Two-Way Circular ANOVA                                                                    | Day 1<br>Region $F(1, 18) = 0.40, p > 0.05$<br>Treatment $F(1, 18) = 0.05, p > 0.05$                                            |                                     |                             |
|                         | Day 2                                    |                        |                                                                                           | Region $F(1, 18) = 0.86, p > 0.05$<br>Treatment $F(1, 18) = 4.11, p > 0.05$                                                     |                                     |                             |
|                         | Day 3                                    |                        |                                                                                           | Region $F(1, 18) = 0.18, p > 0.05$<br>Treatment $F(1, 18) = 10.12, p > 0.05$                                                    |                                     |                             |
|                         | Day 4                                    |                        |                                                                                           | Region $F(1, 18) = 0.11, p > 0.05$<br>Treatment $F(1, 18) = 33.71, p < 0.001$                                                   |                                     |                             |
|                         | Day 5                                    |                        |                                                                                           | Region $F(1, 18) = 4.26, p > 0.05$<br>Treatment $F(1, 18) = 79.28, p < 0.001$                                                   |                                     |                             |
|                         | Day 6                                    |                        |                                                                                           | Region $F(1, 18) = 0.90, p > 0.05$<br>Treatment $F(1, 18) = 59.58, p < 0.001$                                                   |                                     |                             |
|                         | Day 7                                    |                        |                                                                                           | Region $F(1, 18) = 1.17, p > 0.05$<br>Treatment $F(1, 18) = 52.23, p < 0.001$                                                   |                                     |                             |
|                         | Day 8                                    |                        |                                                                                           | Region $F(1, 18) = 2.89, p > 0.05$<br>Treatment $F(1, 18) = 79.12, p < 0.001$                                                   |                                     |                             |

|              |                                               |                        |                                                                            |                                                                                                                                                                           |                                                         |                         |
|--------------|-----------------------------------------------|------------------------|----------------------------------------------------------------------------|---------------------------------------------------------------------------------------------------------------------------------------------------------------------------|---------------------------------------------------------|-------------------------|
| S2d          | LL integrated Ca2+                            | 3 mice                 | JTK Cycle                                                                  | 1/3 rhythmic; $p = 0.035$ , 1 for 2 mice                                                                                                                                  |                                                         |                         |
|              | LD integrated Ca2+                            | 4 mice                 |                                                                            | 3/4 rhythmic; $p = 0.212$ , $< 0.001$ for 3 mice; 95% CI [ZT 5.1, 9.1]                                                                                                    |                                                         |                         |
|              | DD integrated Ca2+                            | 7 mice                 |                                                                            | 6/7 rhythmic; $p = 0.185$ , 0.042, 0.005, 0.001, and $< 0.001$ for 3 mice; 95% CI [CT 6.2, 10.4]                                                                          |                                                         |                         |
| S2e          | LD integrated Ca2+                            | 4 mice                 | Rayleigh Test                                                              | $p = 0.041$ , $z = 2.96$ , $\mu = ZT 7.0$ , $r = 0.86$                                                                                                                    |                                                         |                         |
|              | DD integrated Ca2+                            | 7 mice                 |                                                                            | $p = 0.012$ , $z = 4.02$ , $\mu = CT 8.0$ , $r = 0.76$                                                                                                                    |                                                         |                         |
| S2g          | EGFP Ca2+ events                              | 4 mice                 | JTK Cycle                                                                  | 0/4 rhythmic, $p = 1$ for all mice                                                                                                                                        |                                                         |                         |
| S2h          | EGFP integrated Ca2+                          | 4 mice                 | JTK Cycle                                                                  | 0/4 rhythmic, $p = 1$ for all mice                                                                                                                                        |                                                         |                         |
| S2k          | In vitro Ca2+ (CT sort)                       | 94 cells, 4 slices     | Rayleigh test                                                              | $p < 0.001$ , $z = 51.82$ , $\mu = CT 8.5$ , $r = 0.83$                                                                                                                   |                                                         |                         |
|              | In vitro Ca2+ (start time sort)               |                        | Two-Way Circular ANOVA                                                     | $p < 0.001$ , $z = 25.59$ , $\mu = CT 6.0$ , $r = 0.55$                                                                                                                   |                                                         |                         |
|              | CT vs start time sort                         |                        | Watson-Williams Test                                                       | Sort $X^2 = 40.56$ , $p < 0.001$<br>Sort x Slice $X^2 = 39.29$ , $p < 0.001$<br>CT sort $F(2, 21) = 1.28$ , $p > 0.05$<br>Start time sort $F(2, 21) = 5.63$ , $p = 0.010$ |                                                         |                         |
| S2l          | VIP vs CRH maximum dFF                        | 2, 3 mice              | Two-Way Repeated Measures ANOVA                                            | Genotype $F(1, 3) = 543$ , $p < 0.001$                                                                                                                                    | Sidak's Multiple Comparisons Test                       | $p < 0.001$             |
|              | VIP vs CRH response duration                  |                        |                                                                            | Genotype $F(1, 3) = 62.86$ , $p < 0.01$<br>Time $F(1, 3) = 29.41$ , $p = 0.01$<br>Time x Genotype $F(1, 3) = 14.38$ , $p < 0.05$                                          | Sidak's Multiple Comparisons Test                       | $p = 0.020$ , $< 0.001$ |
| S3b          | KO vs WT CRH+ BMAL+ neurons                   | 4, 4 slices            | Unpaired Welch's t-test (Two-Tailed)                                       | $t(5.99) = 102.2$ , $p < 0.001$                                                                                                                                           |                                                         |                         |
| S3c          | Cre/Cre vs Cre/+ vs Cre/Cre fl/fl CRH neurons | 4, 4, 6 slices         | Brown-Forsythe ANOVA                                                       | $F(2.00, 8.84) = 0.05$ , $p = 0.955$                                                                                                                                      |                                                         |                         |
| S3e          | KO vs WT maximum dFF                          | 3, 3 mice              | Unpaired Welch's t-test (Two-Tailed)                                       | $t(3.32) = 0.15$ , $p = 0.889$                                                                                                                                            |                                                         |                         |
|              | KO vs WT response duration                    |                        |                                                                            | $t(3.93) = 0.14$ , $p = 0.895$                                                                                                                                            |                                                         |                         |
| S3f          | KO LD integrated Ca2+                         | 6 mice                 | JTK Cycle                                                                  | 6/6 rhythmic; $p = 0.018$ , 0.002, 0.005, and $< 0.001$ for 3 mice; 95% CI [ZT 7.4, 9.2]                                                                                  |                                                         |                         |
|              | KO DD integrated Ca2+                         | 6 mice                 |                                                                            | 1/6 rhythmic; $p = 0.192$ , 0.234, 0.687, $< 0.001$ , and 1 for 2 mice                                                                                                    |                                                         |                         |
| S3g          | KO LD integrated Ca2+                         | 6 mice                 | Rayleigh Test                                                              | $p = 0.001$ , $z = 5.51$ , $\mu = ZT 8.3$ , $r = 0.96$                                                                                                                    |                                                         |                         |
|              | KO DD integrated Ca2+                         | 6 mice                 | Rayleigh Test                                                              | $p > 0.05$ , $z = 0.76$ , $\mu = CT 9.1$ , $r = 0.36$                                                                                                                     |                                                         |                         |
|              | KO vs WT LD intg. Ca2+                        | 6, 4 mice              | Watson-Williams Test                                                       | $F(1, 8) = 1.29$ , $p = 0.289$                                                                                                                                            |                                                         |                         |
| S3h          | KO vs WT Ca2+ events                          | 6, 4 mice              | Two-Way Repeated Measures ANOVA                                            | Time $F(48, 358) = 8.30$ , $p < 0.001$<br>Genotype $F(1, 8) = 9.56$ , $p = 0.020$<br>Time x Genotype $F(48, 358) = 2.32$ , $p < 0.001$                                    | Sidak's Multiple Comparisons Test                       | $p = 0.005$ , 0.001     |
| S3j          | KO vs WT corticosterone                       | 12, 13 mice            | Unpaired Welch's t-test (Two-Tailed)                                       | Maximum                                                                                                                                                                   | $t(20.26) = 3.14$ , $p = 0.005$                         |                         |
|              | Minimum                                       |                        |                                                                            | $t(21.75) = 1.42$ , $p = 0.169$                                                                                                                                           |                                                         |                         |
|              | Amplitude                                     |                        |                                                                            | $t(18.97) = 3.02$ , $p = 0.007$                                                                                                                                           |                                                         |                         |
|              | Average                                       |                        |                                                                            | $U = 23$ , $p = 0.002$                                                                                                                                                    |                                                         |                         |
| S4b          | EGFP corticosterone phase                     | 7 mice                 | Rayleigh Test                                                              | Day 1                                                                                                                                                                     | $p = 0.014$ , $z = 4.87$ , $\mu = CT 14.9$ , $r = 0.74$ |                         |
|              | Day 2                                         |                        |                                                                            | $p = 0.001$ , $z = 5.39$ , $\mu = CT 15.1$ , $r = 0.77$                                                                                                                   |                                                         |                         |
|              | Day 3                                         |                        |                                                                            | $p = 0.001$ , $z = 6.24$ , $\mu = CT 15.4$ , $r = 0.83$                                                                                                                   |                                                         |                         |
|              | Chr2 corticosterone phase                     | 9 mice                 | Rayleigh Test                                                              | Day 1                                                                                                                                                                     | $p = 0.005$ , $z = 3.91$ , $\mu = CT 13.7$ , $r = 0.75$ |                         |
|              | Day 2                                         |                        |                                                                            | $p = 0.002$ , $z = 6.05$ , $\mu = CT 17.2$ , $r = 0.93$                                                                                                                   |                                                         |                         |
|              | Day 3                                         |                        |                                                                            | $p = 0.001$ , $z = 6.11$ , $\mu = CT 14.7$ , $r = 0.93$                                                                                                                   |                                                         |                         |
| EGFP vs Chr2 | 9, 7 mice                                     | Two-Way Circular ANOVA | Day $F(1, 42) = 2.94$ , $p = 0.061$<br>$F(1, 14) = 0.06$ , $p > 0.05$      |                                                                                                                                                                           |                                                         |                         |
|              |                                               | Watson-Williams Test   | $F(1, 14) = 3.20$ , $p = 0.090$<br>$F(1, 14) = 0.47$ , $p > 0.05$          |                                                                                                                                                                           |                                                         |                         |
| S4d          | EGFP corticosterone phase                     | 5 mice                 | Rayleigh Test                                                              | Day 1                                                                                                                                                                     | $p = 0.028$ , $z = 3.30$ , $\mu = CT 15.1$ , $r = 0.81$ |                         |
|              | Day 2                                         |                        |                                                                            | $p = 0.005$ , $z = 4.48$ , $\mu = CT 14.1$ , $r = 0.95$                                                                                                                   |                                                         |                         |
|              | Day 3                                         |                        |                                                                            | $p = 0.015$ , $z = 3.73$ , $\mu = CT 15.2$ , $r = 0.86$                                                                                                                   |                                                         |                         |
|              | Chr2 corticosterone phase                     | 5 mice                 | Rayleigh Test                                                              | Day 1                                                                                                                                                                     | $p = 0.008$ , $z = 4.19$ , $\mu = CT 15.1$ , $r = 0.92$ |                         |
|              | Day 2                                         |                        |                                                                            | $p = 0.003$ , $z = 4.68$ , $\mu = CT 15.2$ , $r = 0.97$                                                                                                                   |                                                         |                         |
|              | Day 3                                         |                        |                                                                            | $p = 0.015$ , $z = 3.73$ , $\mu = CT 18.7$ , $r = 0.86$                                                                                                                   |                                                         |                         |
| EGFP vs Chr2 | 5, 5 mice                                     | Two-Way Circular ANOVA | Genotype $F(1, 24) = 3.57$ , $p = 0.042$<br>$F(1, 8) = 0.001$ , $p > 0.05$ |                                                                                                                                                                           |                                                         |                         |
|              |                                               | Watson-Williams Test   | $F(1, 8) = 2.27$ , $p > 0.05$<br>$F(1, 8) = 5.87$ , $p = 0.041$            |                                                                                                                                                                           |                                                         |                         |
| S5b          | EGFP vs hM4DI CORT amplitude                  | 8, 8 mice              | Two-Way Repeated Measures ANOVA                                            | Time x Genotype $F(5, 70) = 2.524$ , $p = 0.037$                                                                                                                          | Sidak's Multiple Comparisons Test                       | $p = 0.044$             |

**Supplementary Table 1. Statistical tests and results for each relevant figure in the paper.**

| Genotype            | Primer            | Sequence                           |
|---------------------|-------------------|------------------------------------|
| <b>Crh-IRES-Cre</b> | Mutant forward    | CAA TGT ATC TTA TCA TGT CTG GAT CC |
|                     | Common            | CTT ACA CAT TTC GTC CTA GCC        |
|                     | Wild-type forward | CAC GAC CAG GCT GCG GCT AAC        |
| <b>Bmal1fl/fl</b>   | Forward           | ACT GGA AGT AAC TTT ATC AAA CTG    |
|                     | Reverse           | CTG ACC AAC TTG CTA ACA ATT A      |
| <b>Vip-IRES-Cre</b> | Mutant forward    | CCC CCT GAA CCT GAA ACA TA         |
|                     | Common            | GGA CAC AGT AAG GGC ACA CA         |
|                     | Wild-type forward | TCC TTG GAA CAT TCC TCA GC         |
| <b>Ai14</b>         | Wild-type forward | AAG GGA GCT GCA GTG GAG TA         |
|                     | Wild-type reverse | CCG AAA ATC TGT GGG AAG TC         |
|                     | Mutant forward    | GGC ATT AAA GCA GCG TAT CC         |
|                     | Mutant reverse    | CTG TTC CTG TAC GGC ATG G          |
| <b>Vip-IRES-Flp</b> | Mutant forward    | AGG ATT GGG AAG ACA ATA GCA        |
|                     | Common            | CAC CTC TGA TTT CAG CTC TGC        |
|                     | Wild-type forward | GGC TGA TTT TCA ATA GTA TGG TCT C  |
| <b>Ai32</b>         | Wild-type forward | AAG GGA GCT GCA GTG GAG TA         |
|                     | Wild-type reverse | CCG AAA ATC TGT GGG AAG TC         |
|                     | Mutant forward    | ACA TGG TCC TGC TGG AGT TC         |
|                     | Mutant reverse    | GGC ATT AAA GCA GCG TAT CC         |
| <b>PER2::LUC</b>    | Common            | CTG TGT TTA CTG CGA GAG T          |
|                     | Wild-type reverse | GGG TCC ATG TGA TTA GAA AC         |
|                     | Mutant reverse    | TAA AAC CCG GAG GTA GAT GAG A      |

**Supplementary Table 2. Genotyping primers used in this study.**
